# Supplementary material
Source: publisher site journal article supplement (https://mycokeys.pensoft.net/article/22548/download/suppl/31/)

- *Protoparmelia* (11 species)
- *Maronina* (12 species)

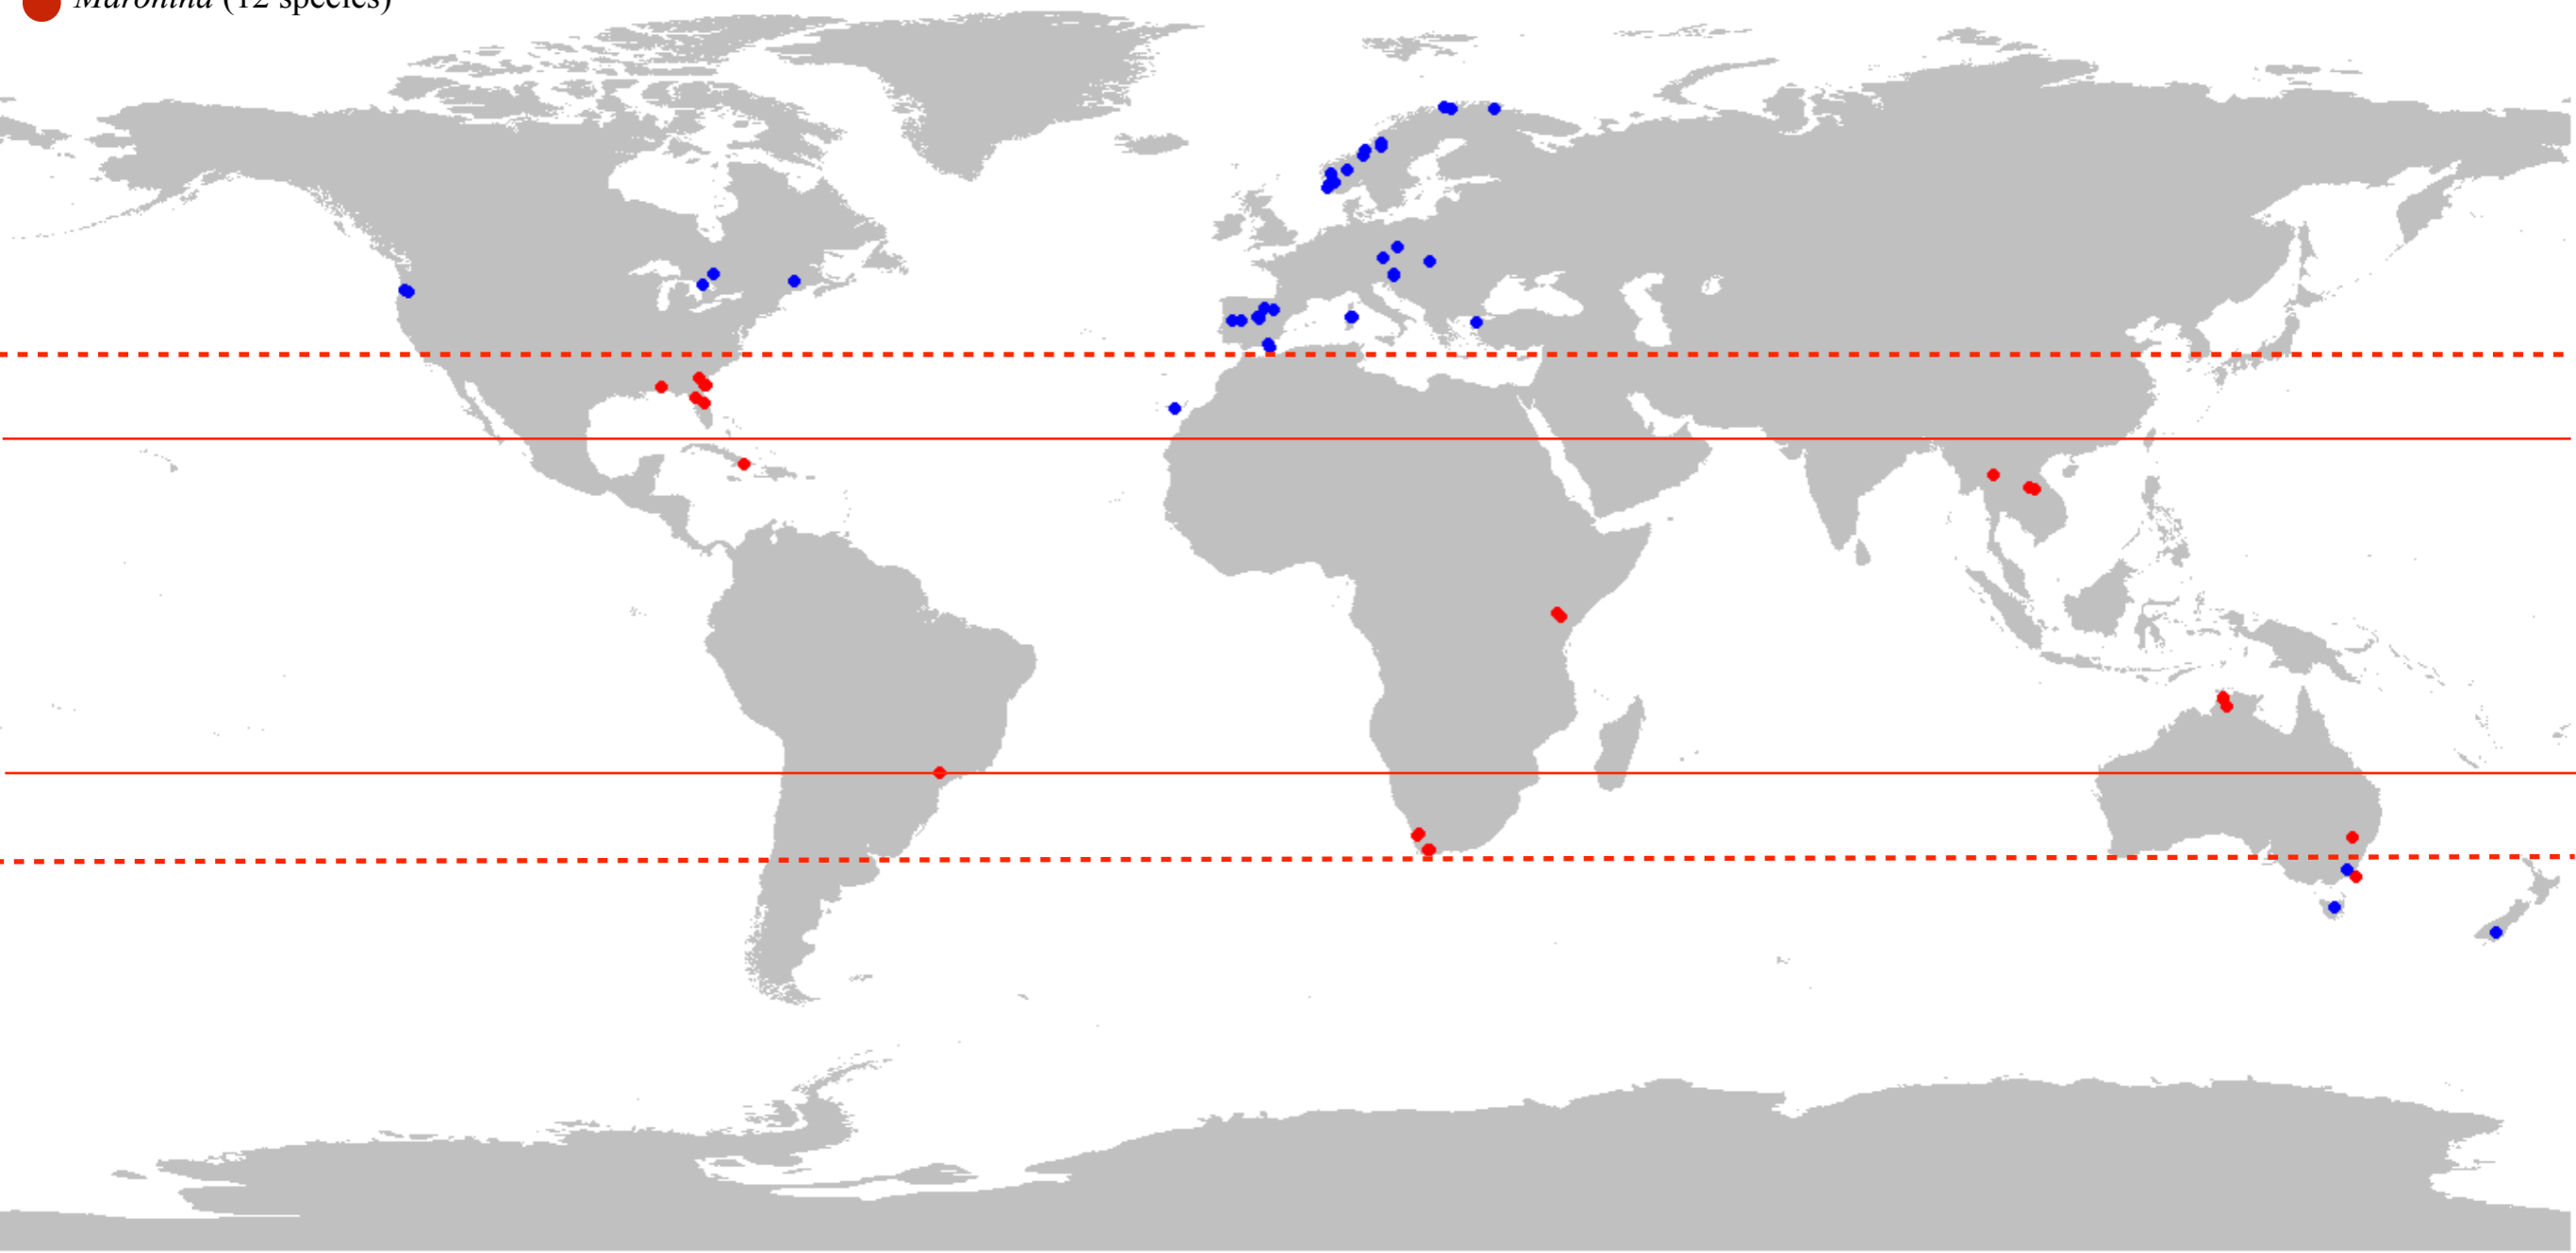

Supplement: Supplementary file 1
